# Supplementary material for: Base-modified NAD and AMP derivatives and their activity against bacterial DNA ligases
Source: Royal Society of Chemistry journal article supplement (doi:10.1039/c5ob00294j), 2015-01-01
Supplement: c5ob00294j1.pdf [file c5ob00294j1.pdf]

## SUPPORTING INFORMATION

### Base-modified NAD and AMP derivatives and their activity against bacterial DNA ligases

Giulia Pergolizzi [a, b], Marco M. D. Cominetti [a], Julea N. Butt [c], Robert A. Field [b],  
Richard P. Bowater [d] and Gerd K. Wagner [a, e]\*

[a] School of Pharmacy, University of East Anglia, Norwich Research Park,  
Norwich, NR4 7TJ, UK

[b] Department of Biological Chemistry, John Innes Centre, Norwich Research  
Park, Norwich, NR4 7UH, UK

[c] School of Chemistry, University of East Anglia, Norwich Research Park,  
Norwich, NR4 7TJ, UK

[d] School of Biological Sciences, University of East Anglia, Norwich Research  
Park, Norwich, NR4 7TJ, UK

[e] Department of Chemistry, Faculty of Natural & Mathematical Sciences,  
King's College London, Britannia House, 7 Trinity Street, London, SE1 1DB,  
UK. Phone: +44 (0)20 7848 1926; e-mail: [gerd.wagner@kcl.ac.uk](mailto:gerd.wagner@kcl.ac.uk)

\*Corresponding author

### CONTENT

- (1) .....<sup>1</sup>H, <sup>13</sup>C and <sup>31</sup>P NMR spectra for the following compounds
- a. 2-substituted NAD derivatives **1a** and **1b**
  - b. 6-substituted NAD derivatives **2a** and **2b**
  - c. 2-substituted AMP derivatives **6a** and **6b**
  - d. 6-substituted AMP derivatives **10a** and **10b**
  - e. 6-(pyrrol-2-yl) adenosine **7b**
  - f. isopropylidene-protected 6-(pyrrol-2-yl) adenosine **8b**
  - g. phosphoromorpholidates **12a**, **12b**, **13a** and **13b**
- (2) .....Concentration-response curves from IC<sub>50</sub> experiments

# (1) NMR spectra

## <sup>1</sup>H NMR: 1a

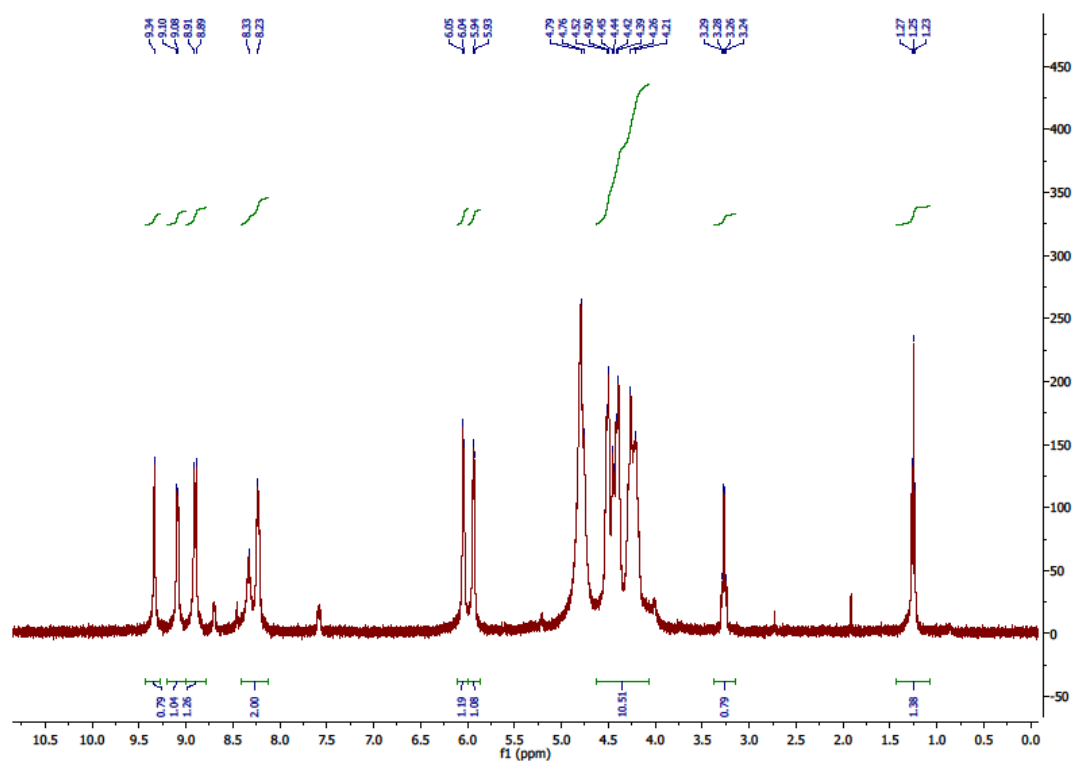

## <sup>13</sup>C NMR: 1a

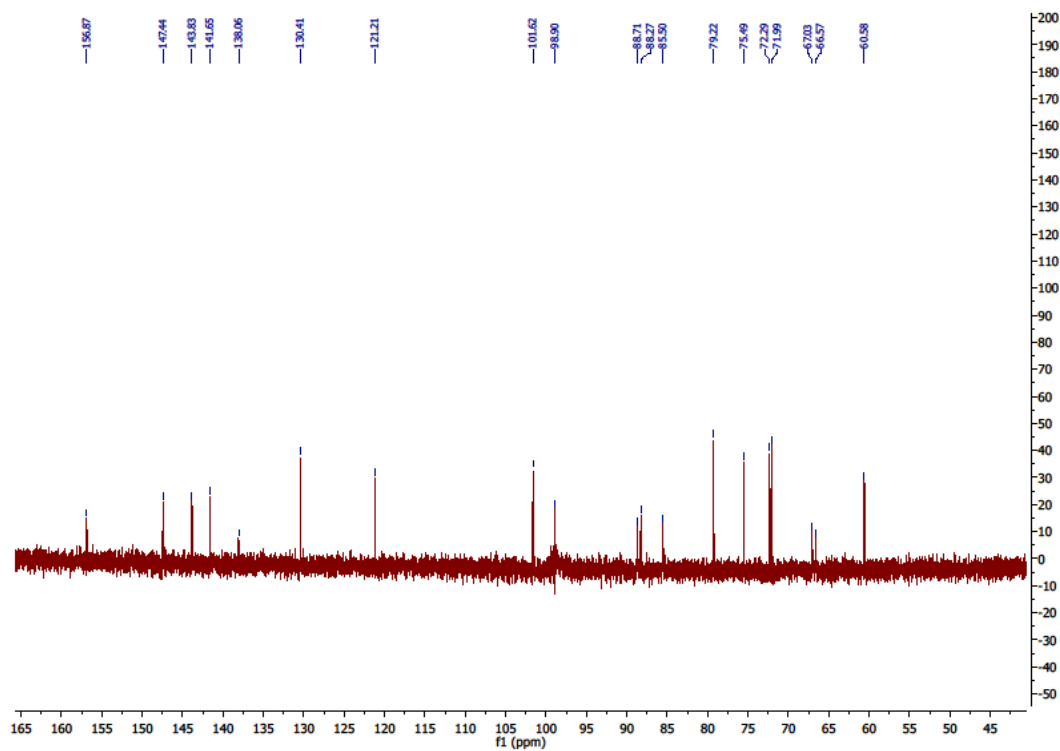

**<sup>31</sup>P NMR: 1a**

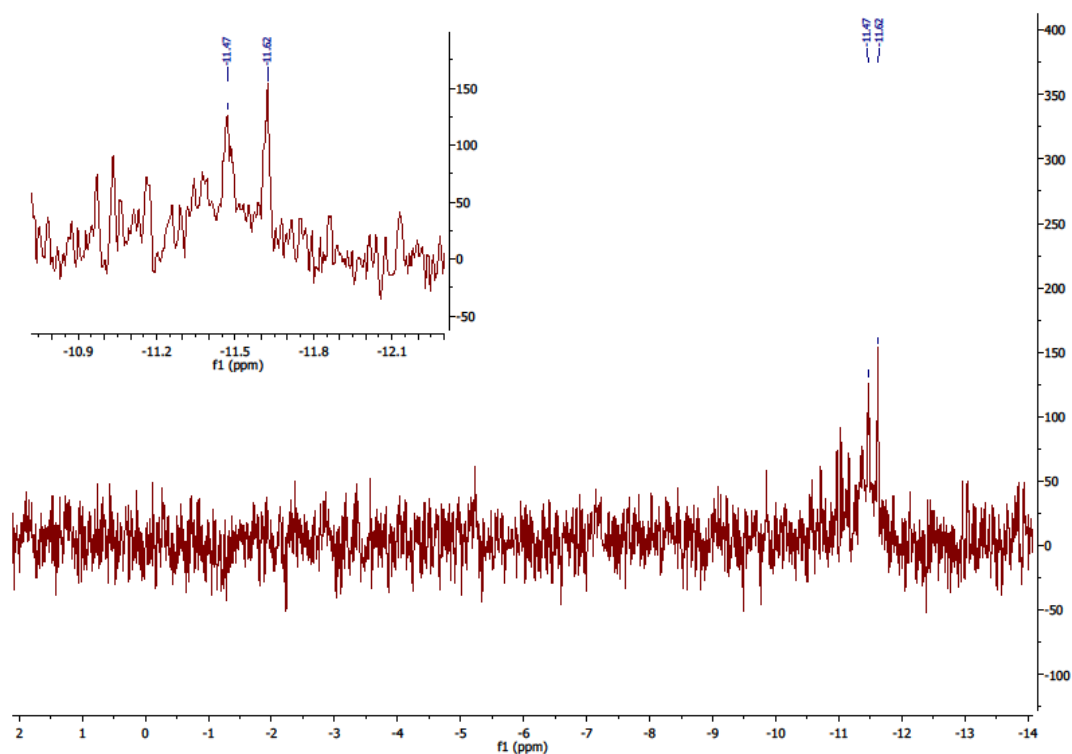

**<sup>1</sup>H NMR: 1b**

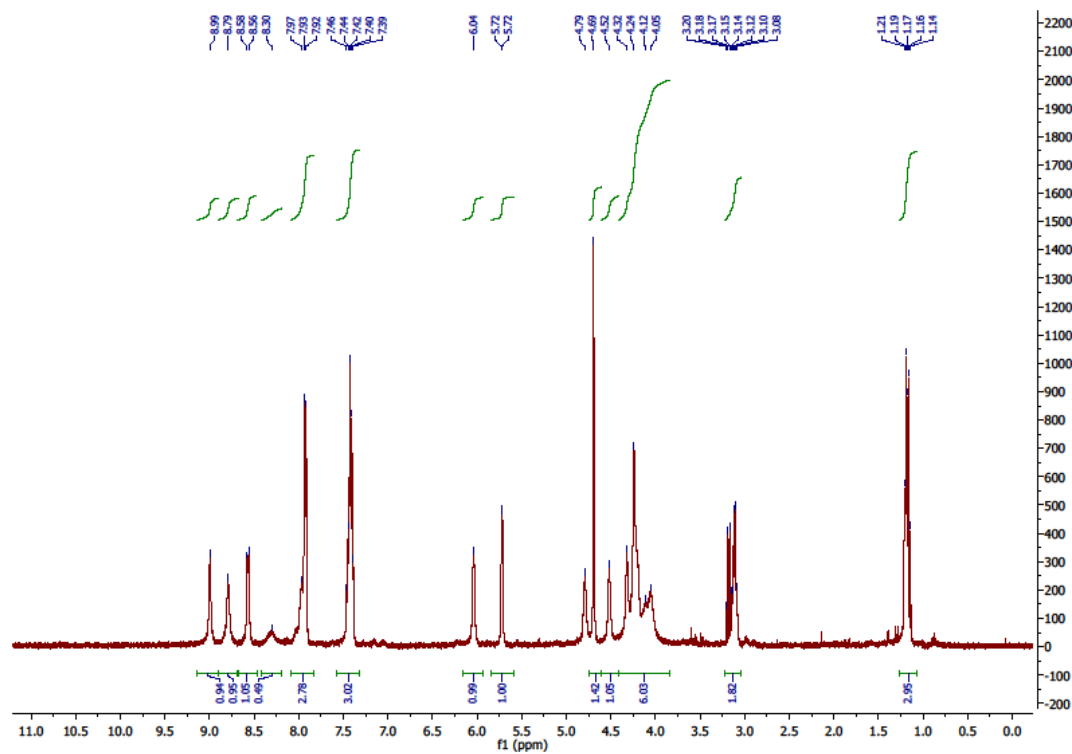

**<sup>13</sup>C NMR: 1b**

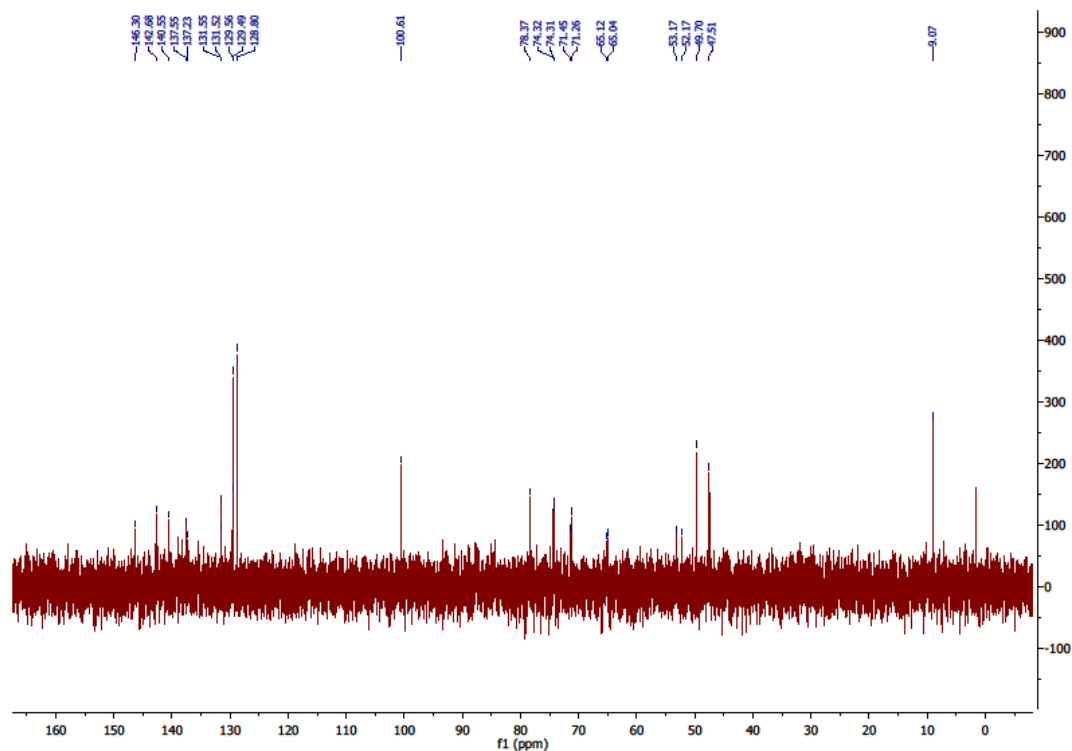

**<sup>31</sup>P NMR: 1b**

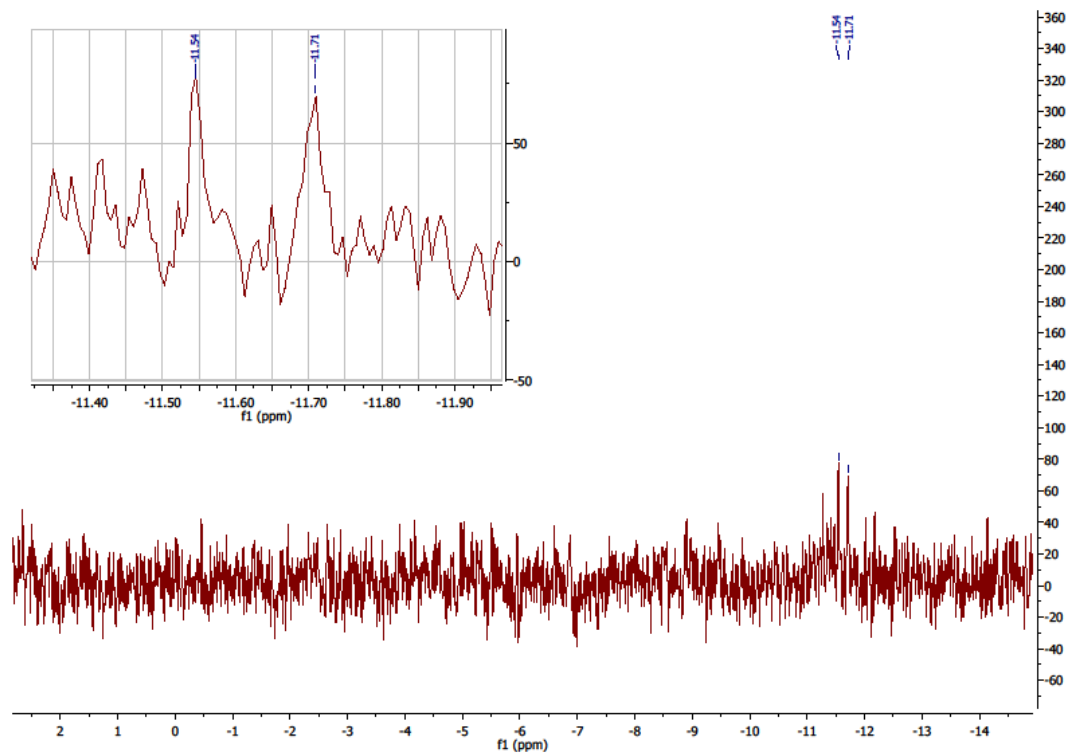

**<sup>1</sup>H NMR: 2a**

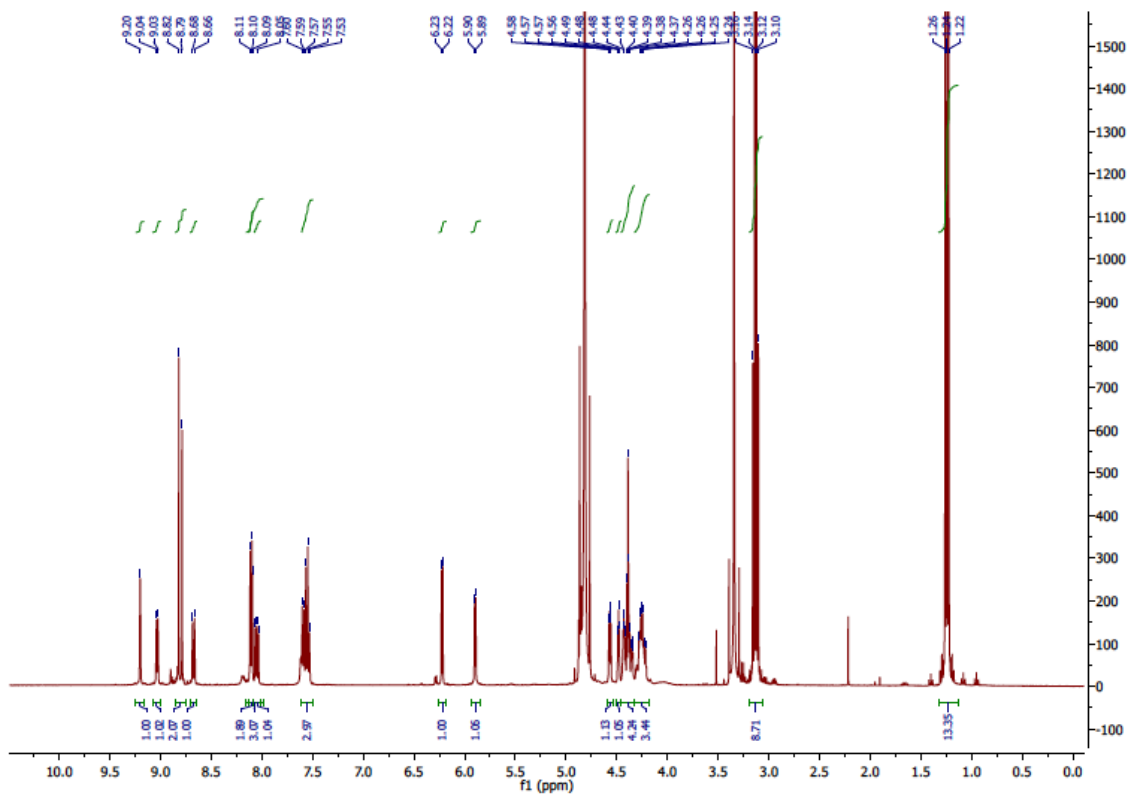

**<sup>13</sup>C NMR: 2a**

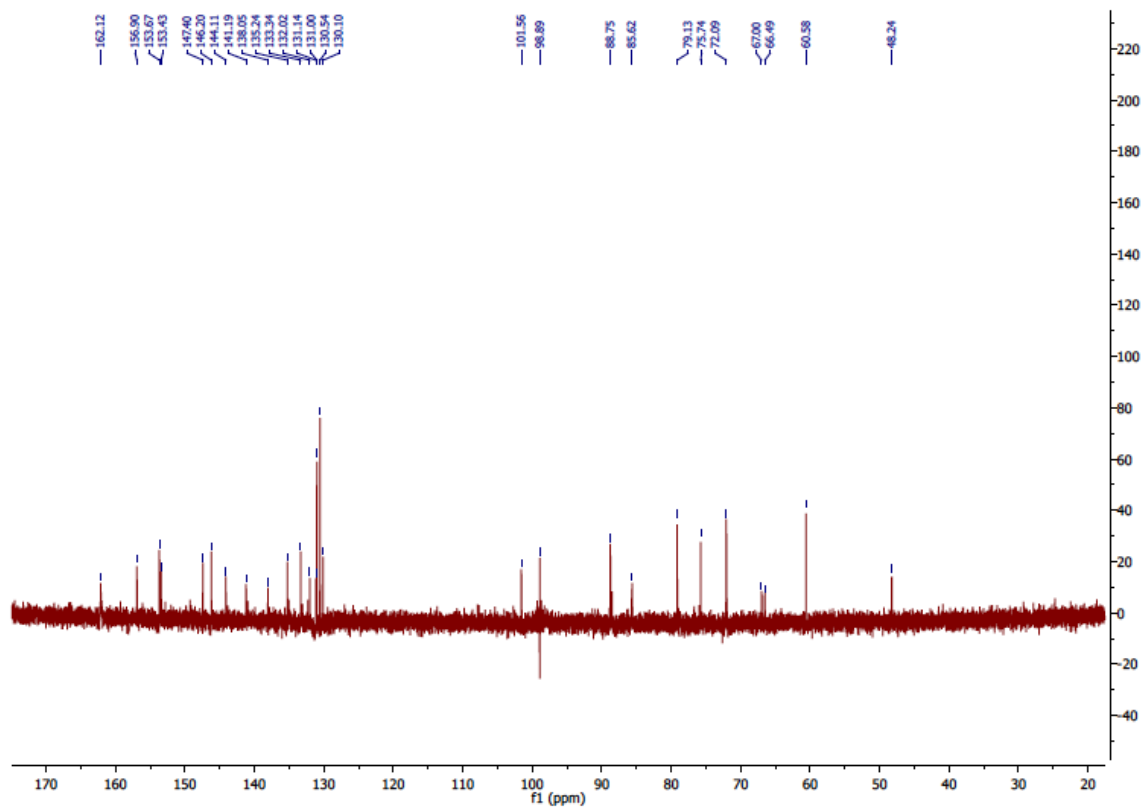

**<sup>31</sup>P NMR: 2a**

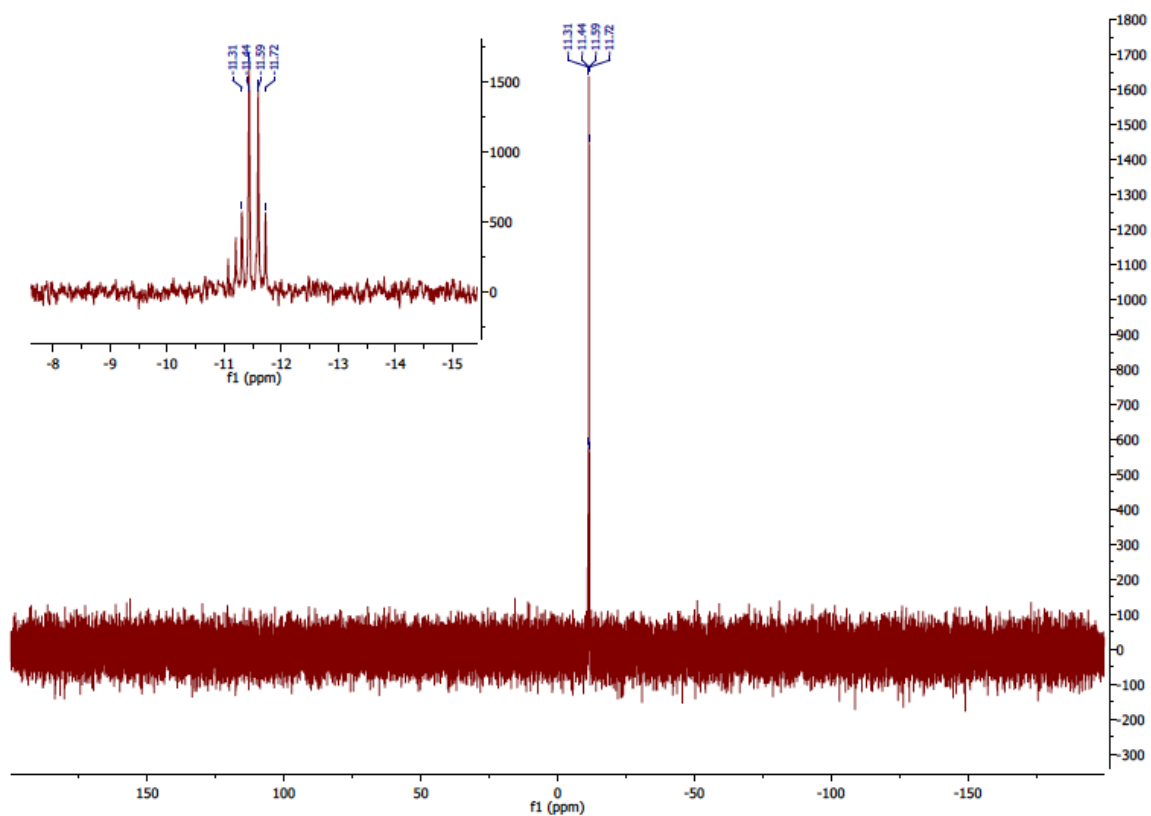

**<sup>1</sup>H NMR: 2b**

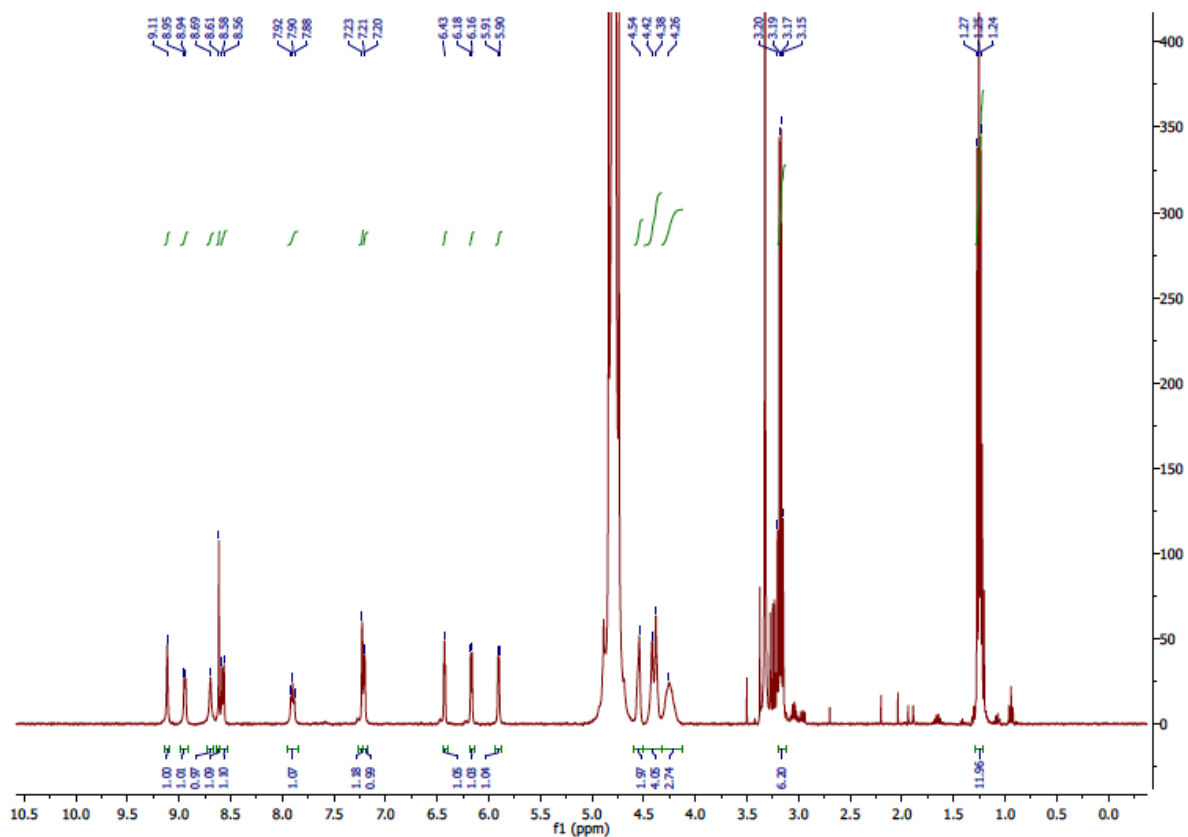

**<sup>13</sup>C NMR: 2b**

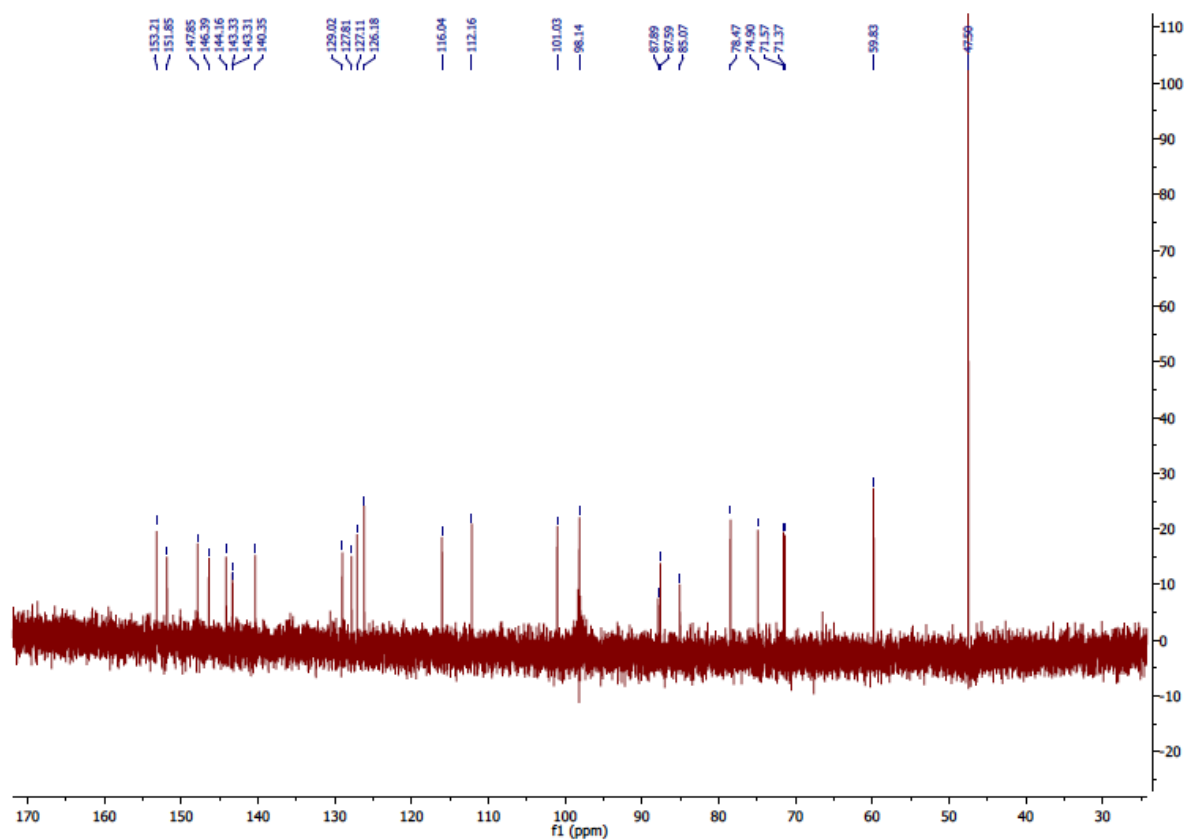

**<sup>31</sup>P NMR: 2b**

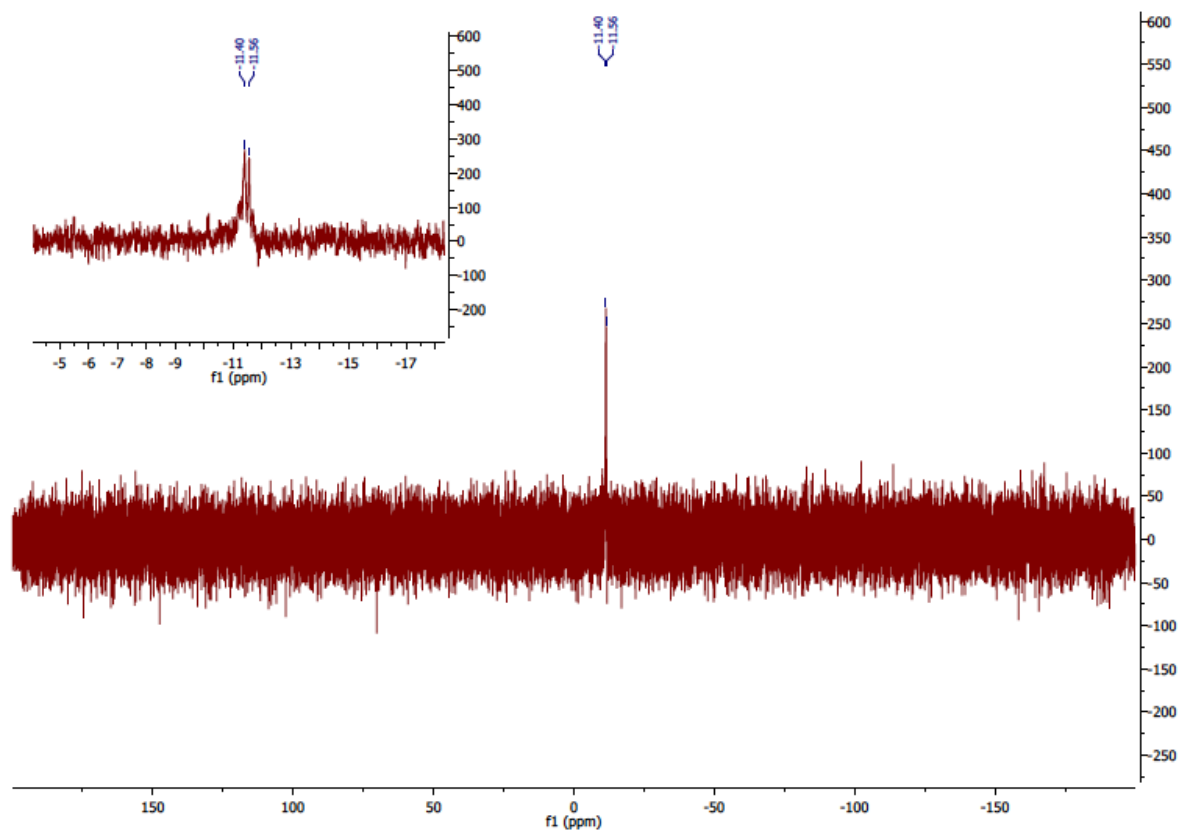

**<sup>1</sup>H NMR: 6a**

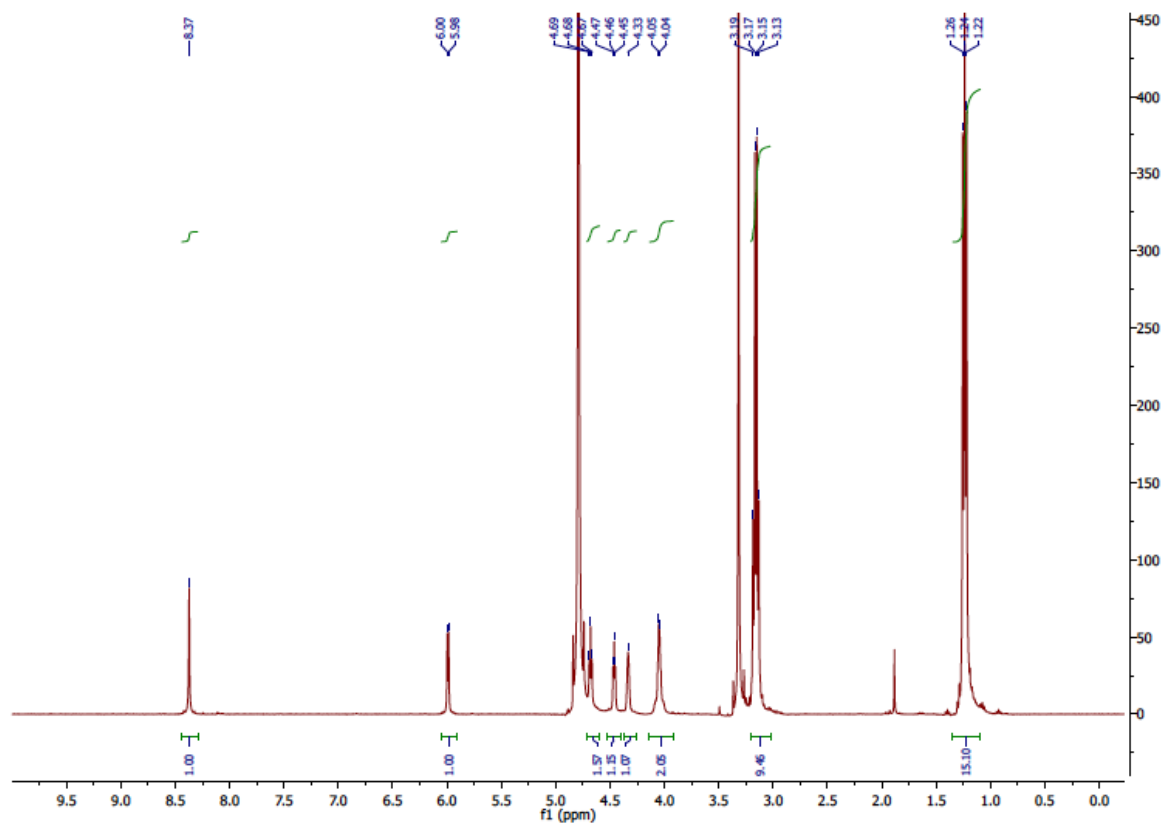

**<sup>13</sup>C NMR: 6a**

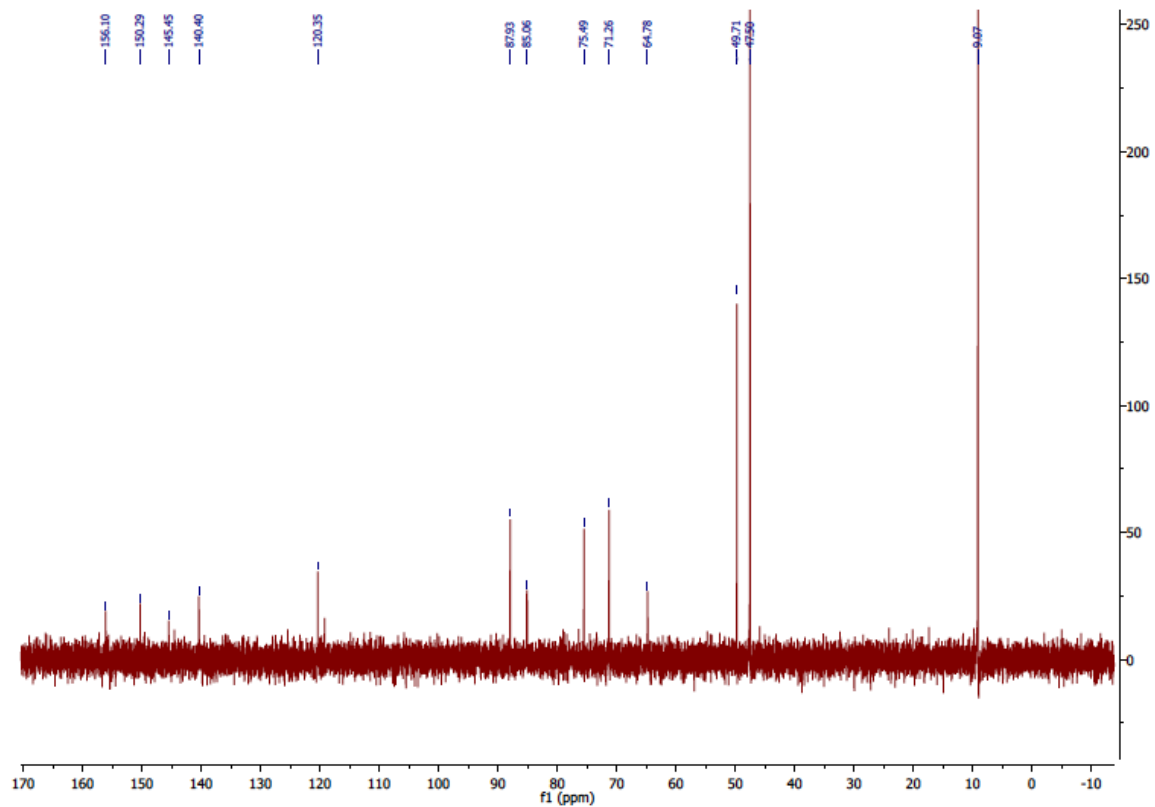



**<sup>31</sup>P NMR: 6a**

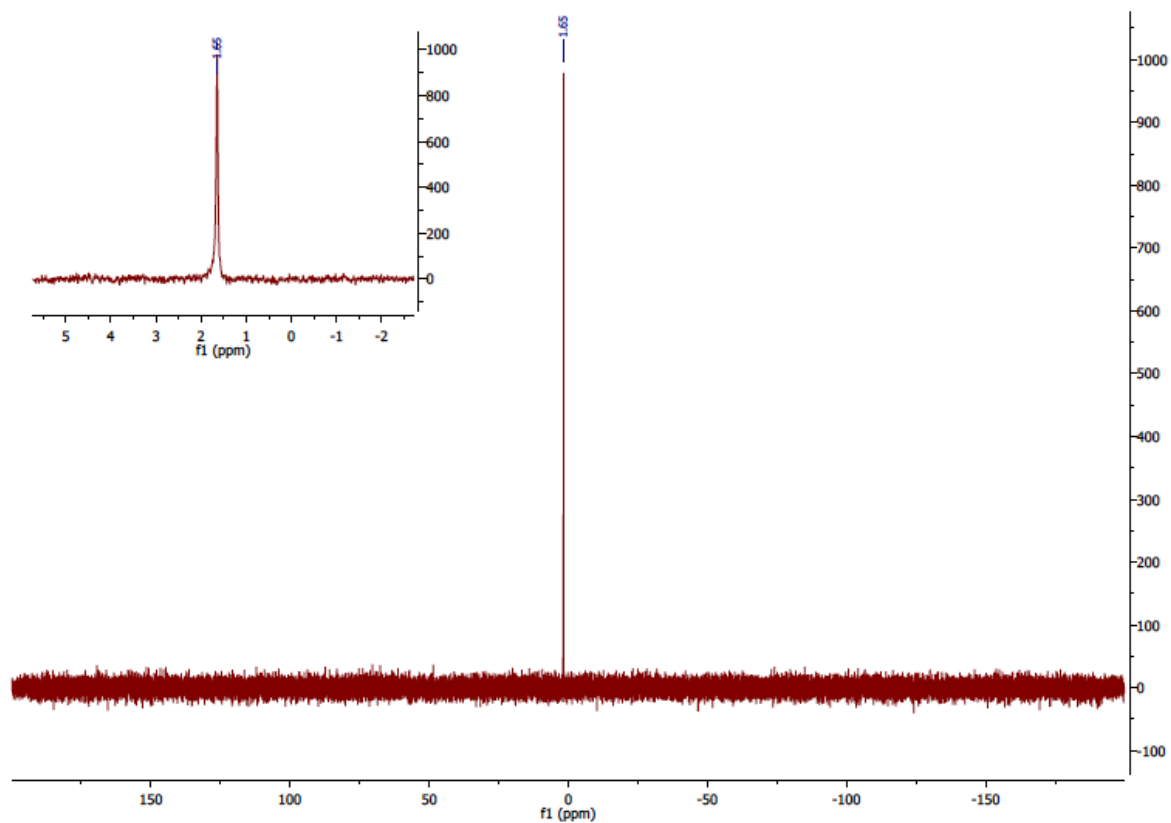

**<sup>1</sup>H NMR: 6b**

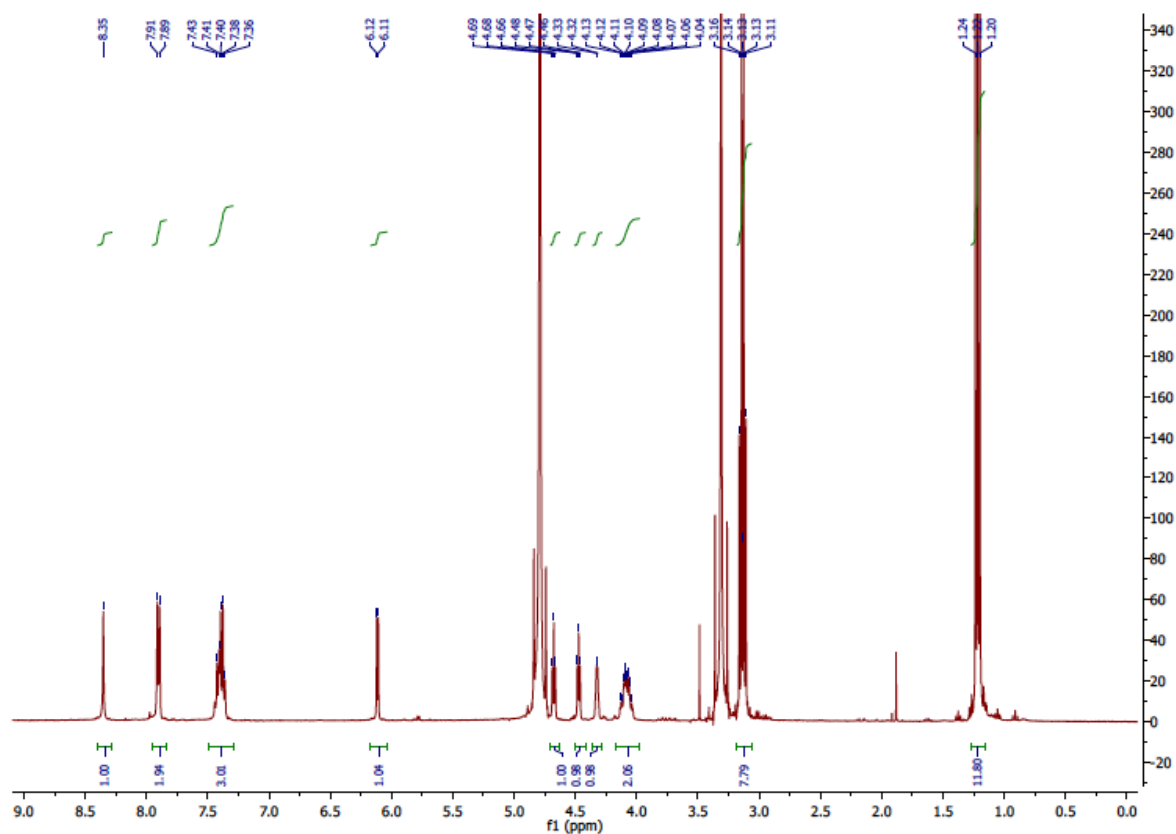

**<sup>13</sup>C NMR: 6b**

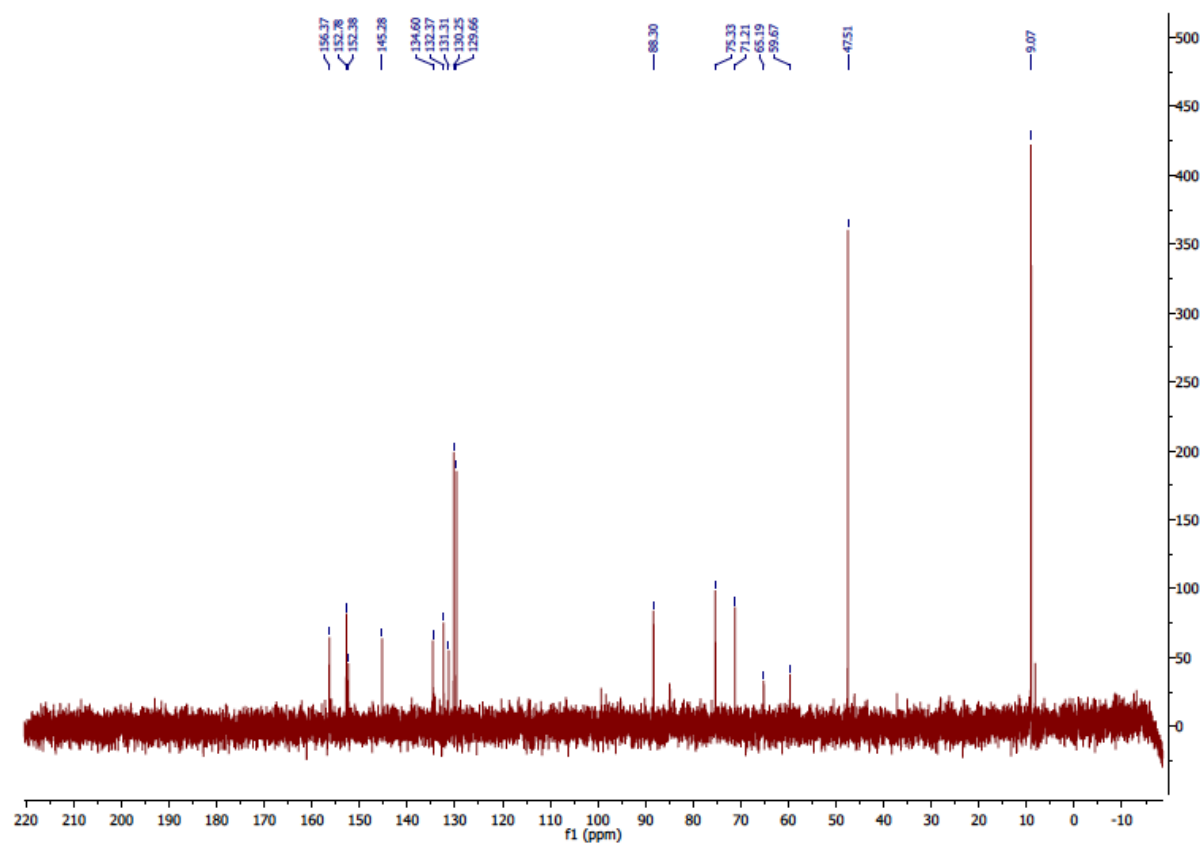

**<sup>31</sup>P NMR: 6b**

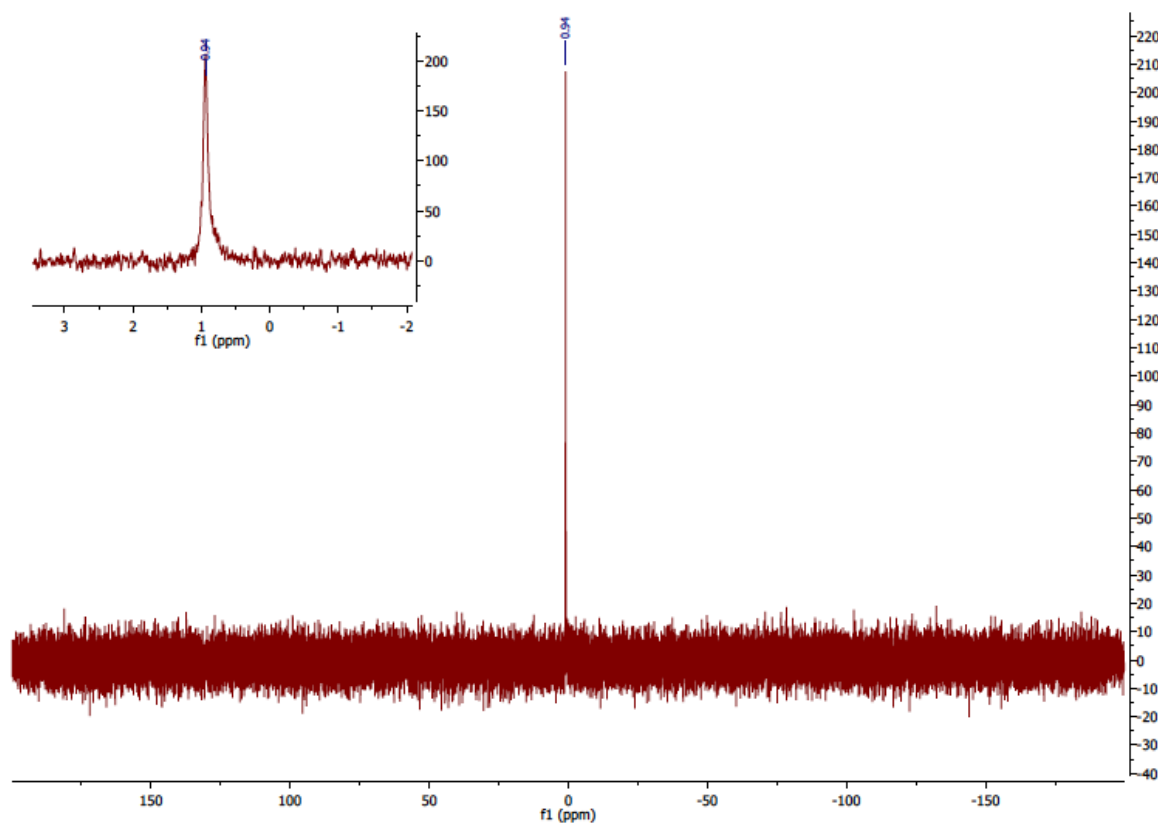

**<sup>1</sup>H NMR: 10a**

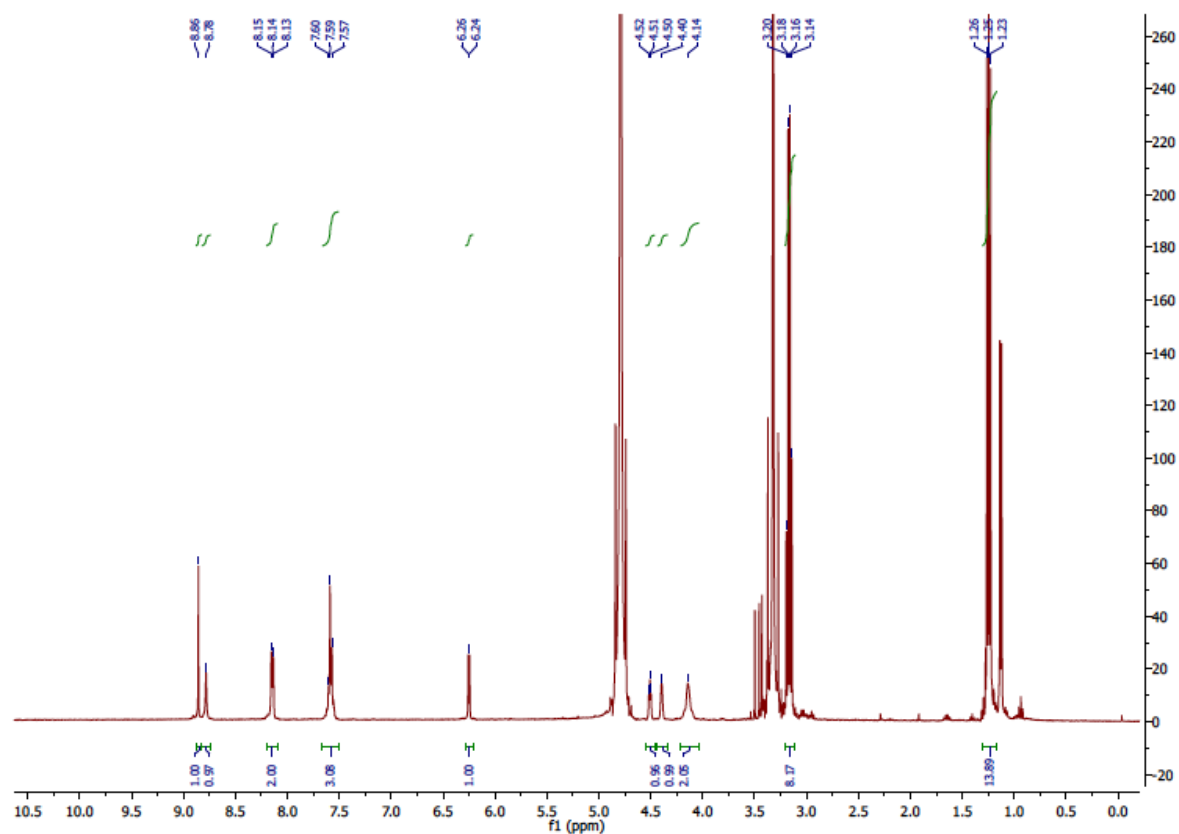

**<sup>13</sup>C NMR: 10a**

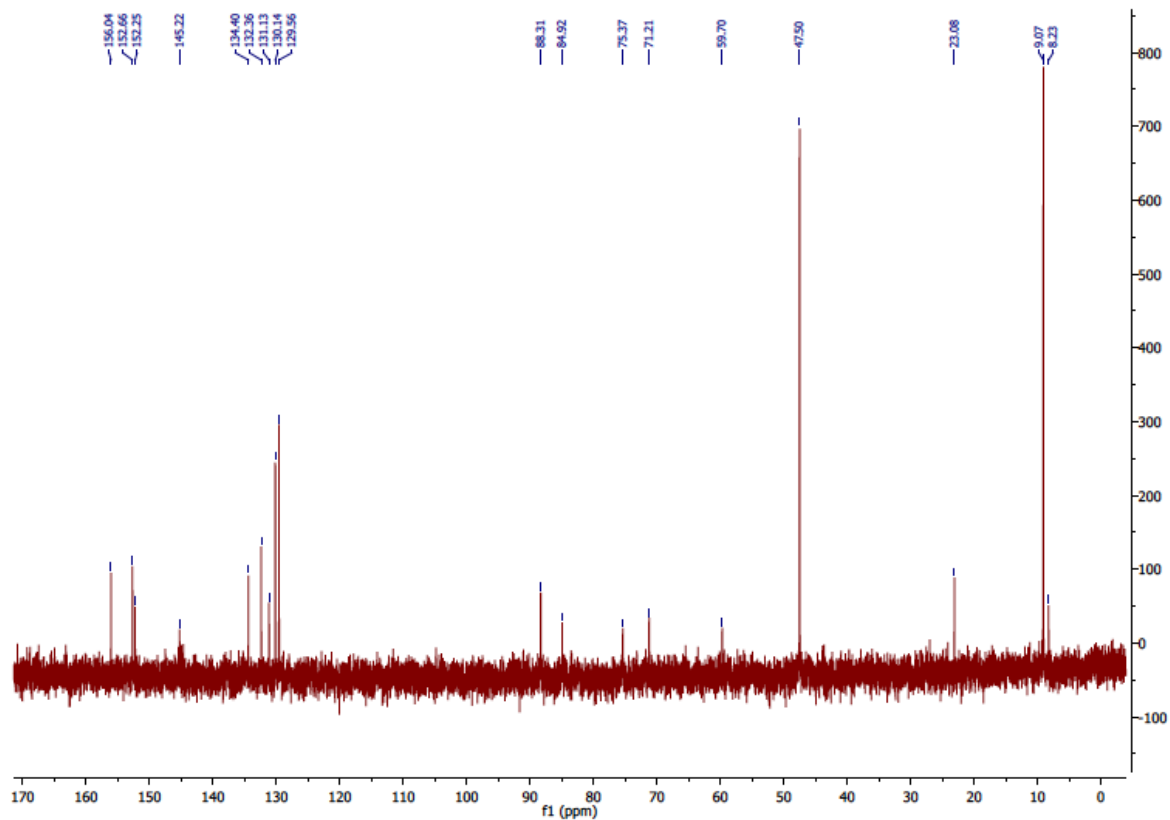

**<sup>31</sup>P NMR: 10a**

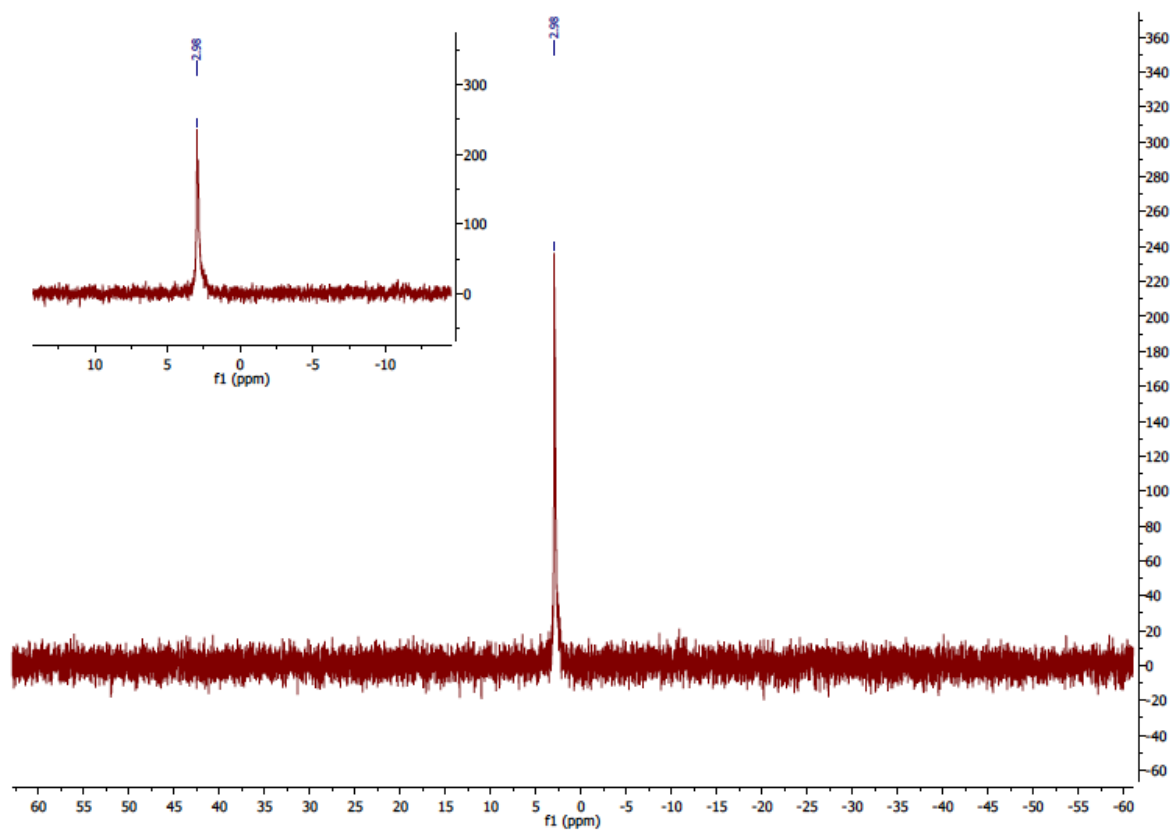

**<sup>1</sup>H NMR: 10b**

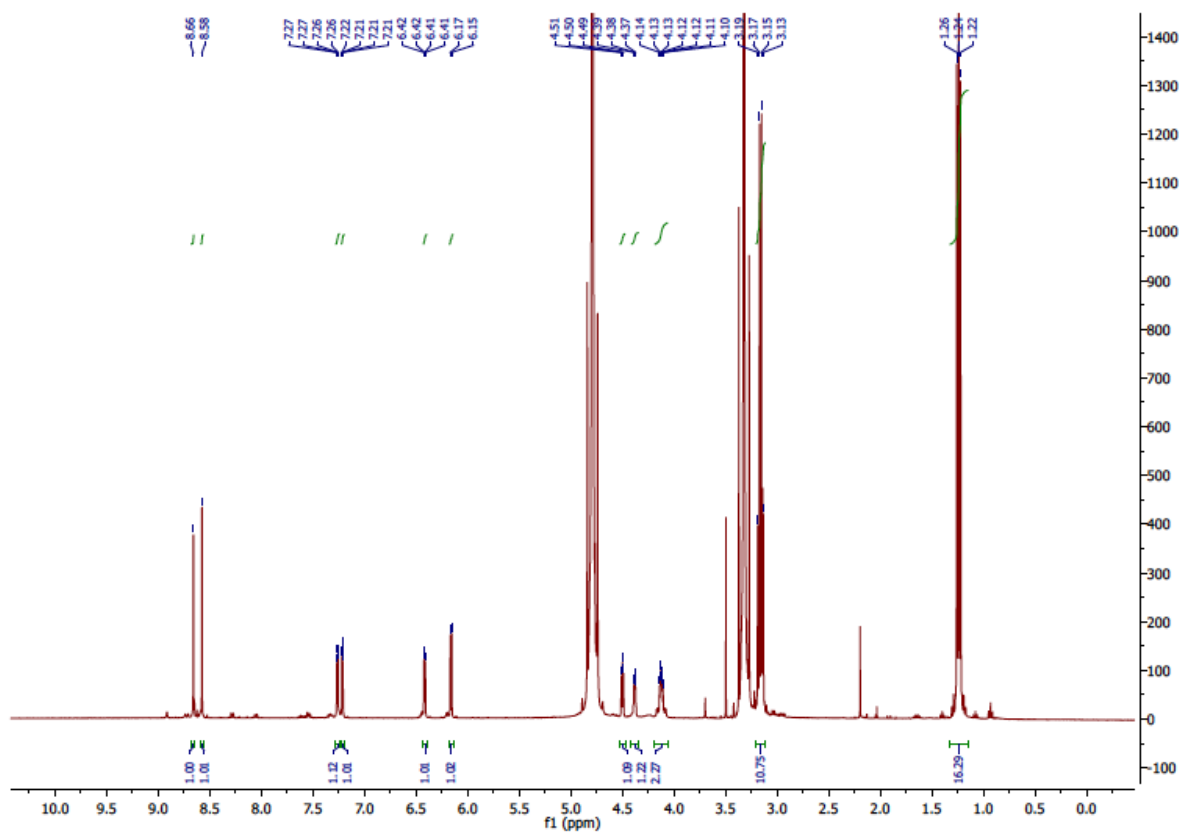

**<sup>13</sup>C NMR: 10b**

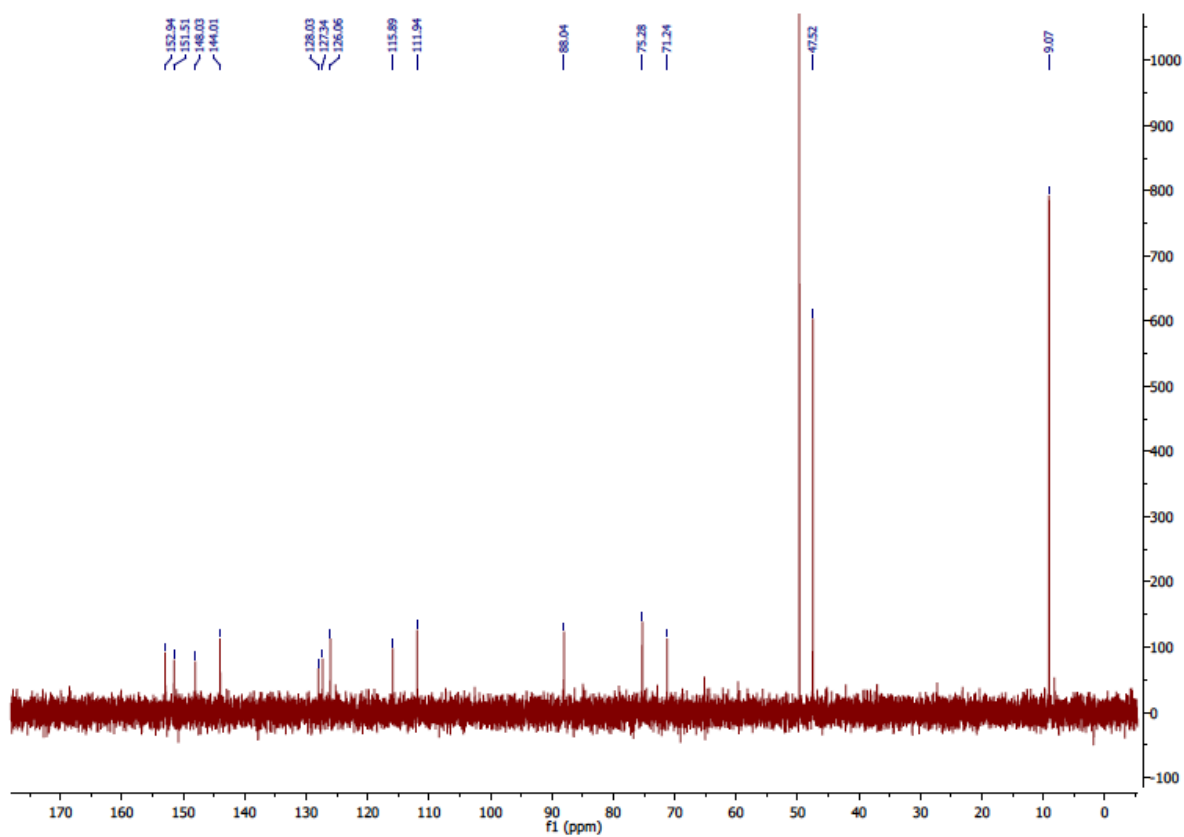

**<sup>31</sup>P NMR: 10b**

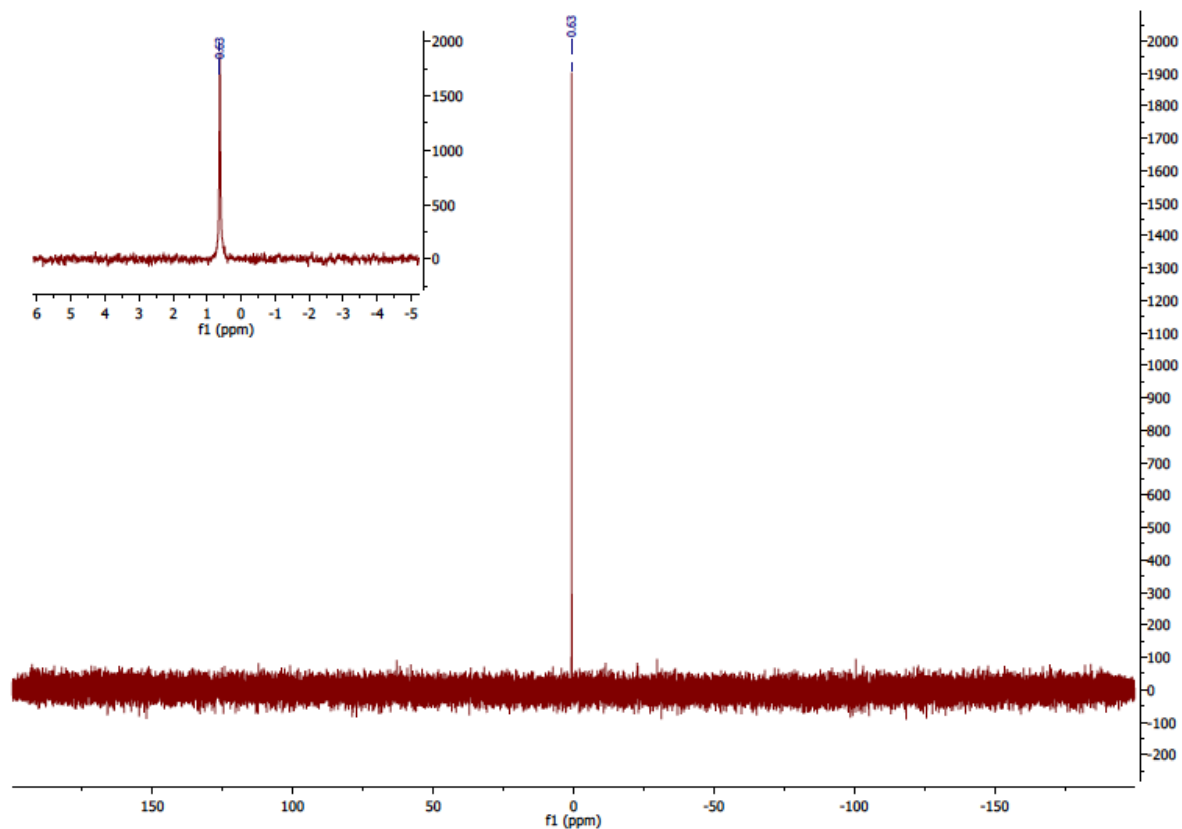

**<sup>1</sup>H NMR: 7b**

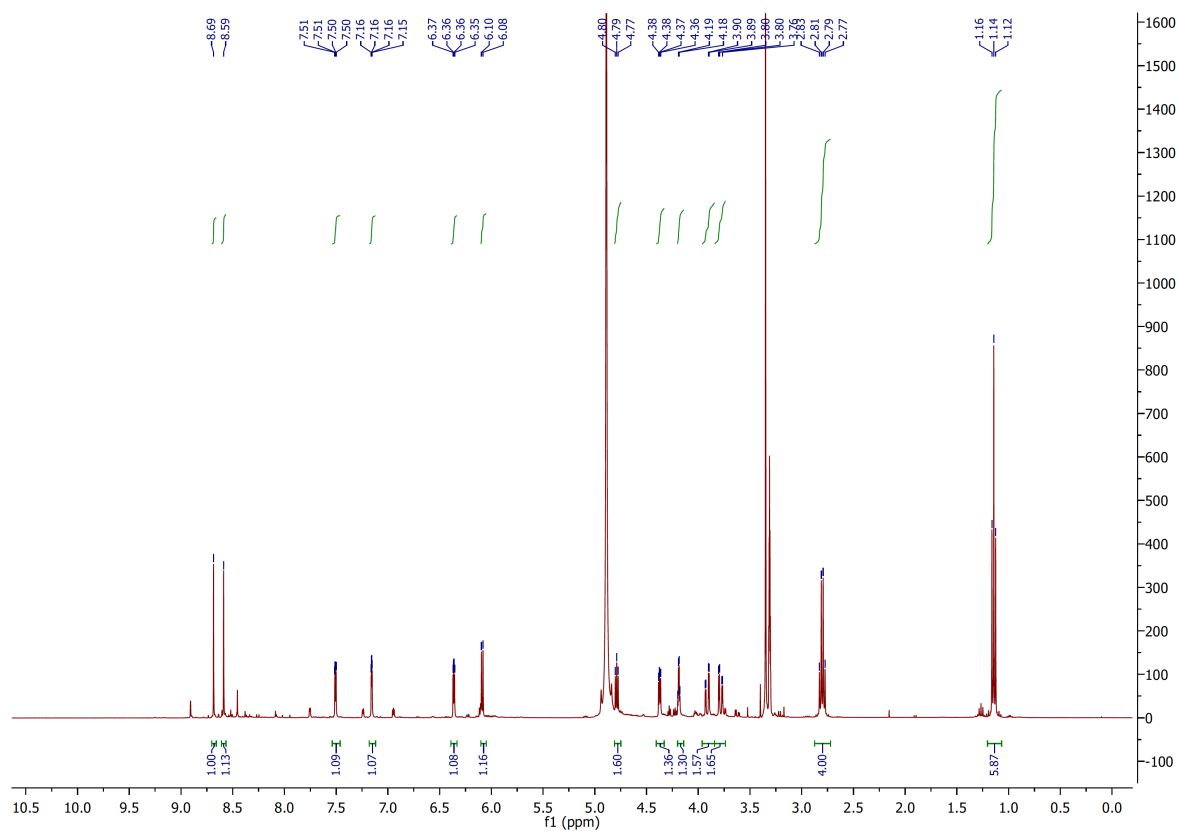

**<sup>13</sup>C NMR: 7b**

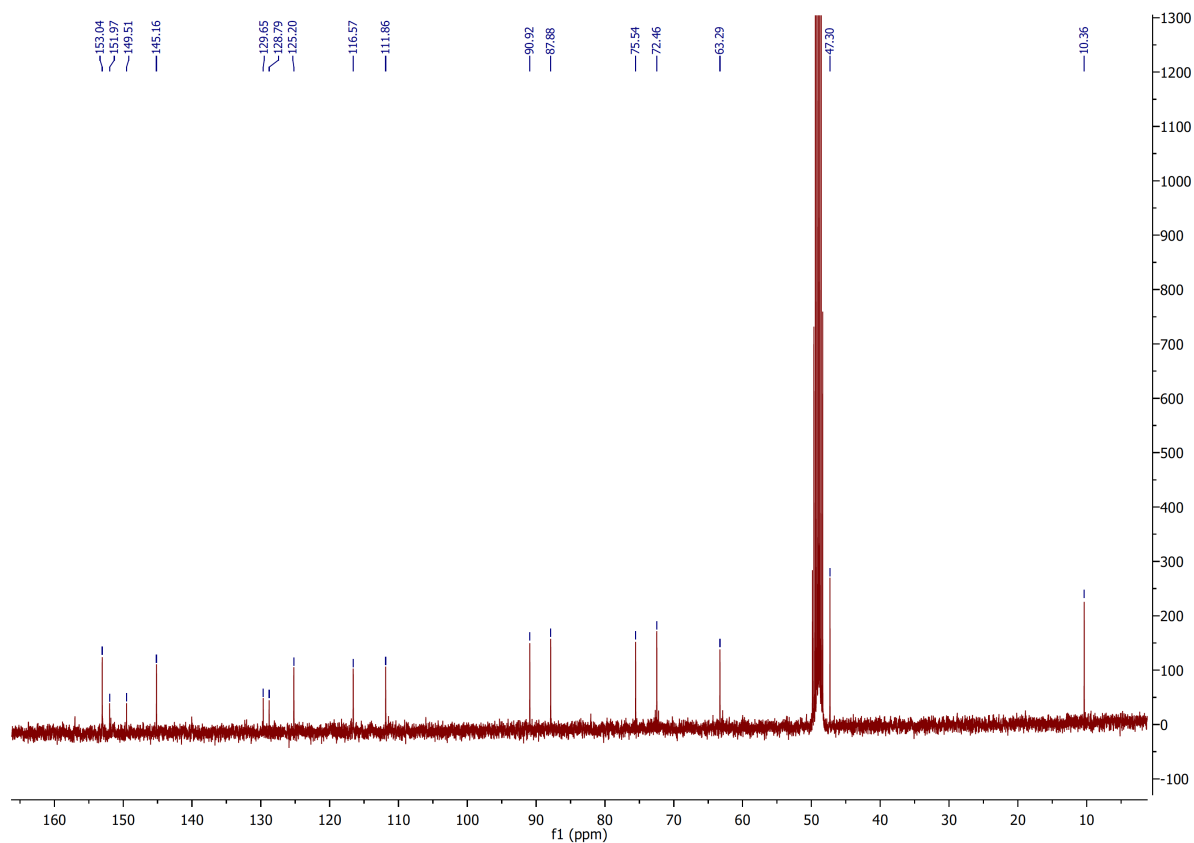

**<sup>1</sup>H NMR: 8b**

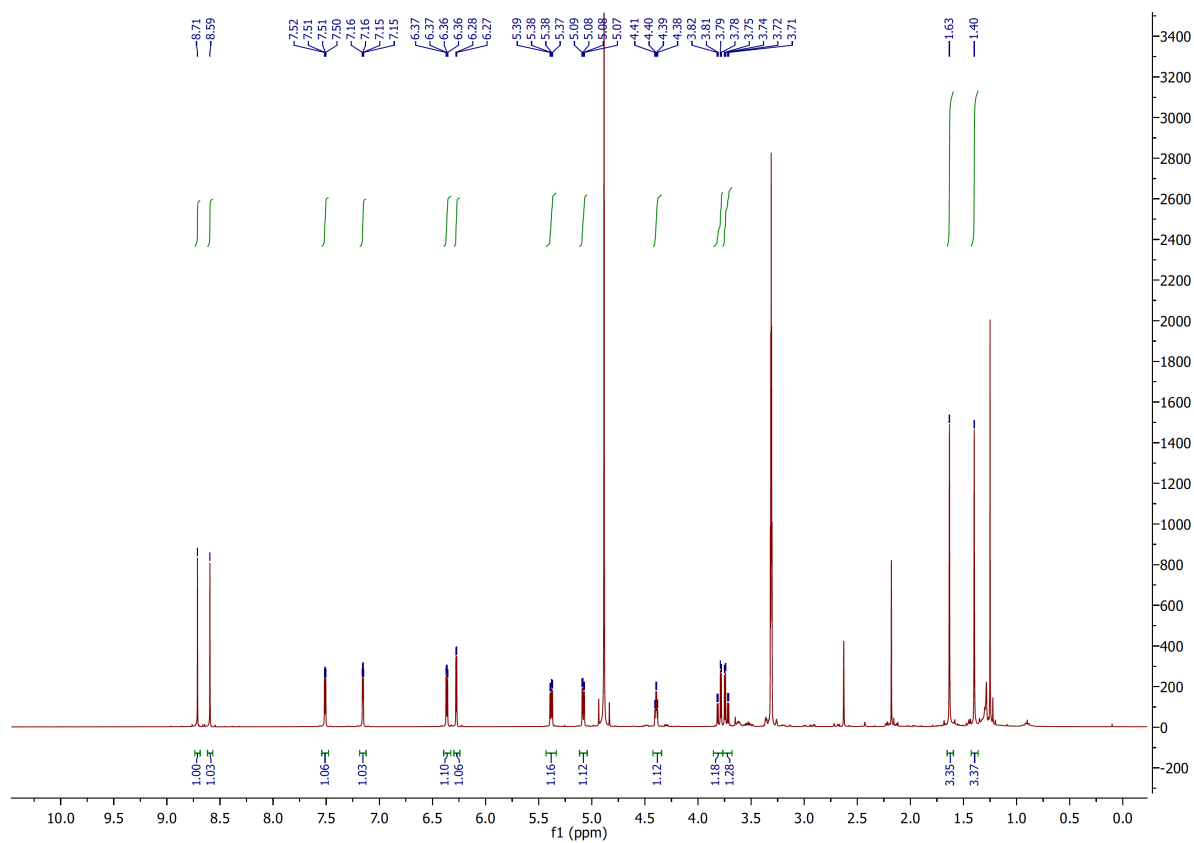

**<sup>1</sup>H NMR: 12a**

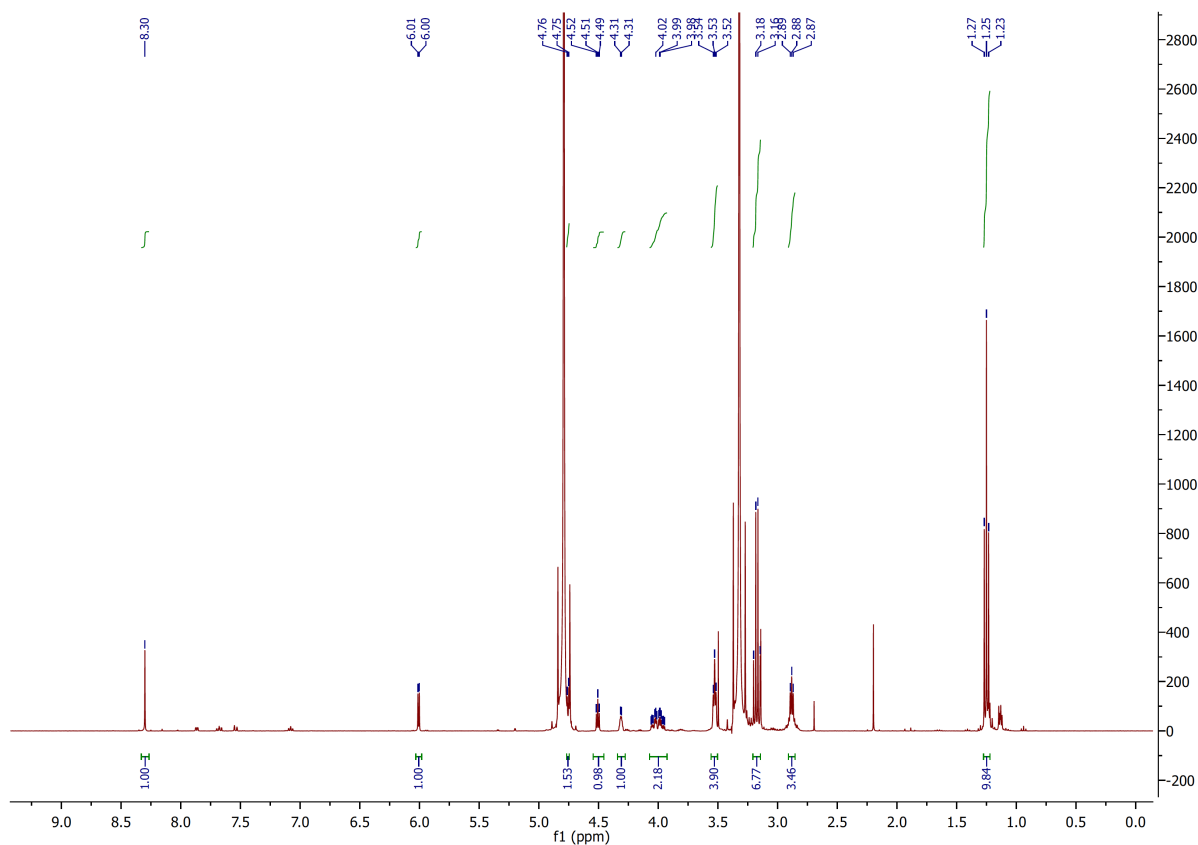

### <sup>1</sup>H NMR: 12b

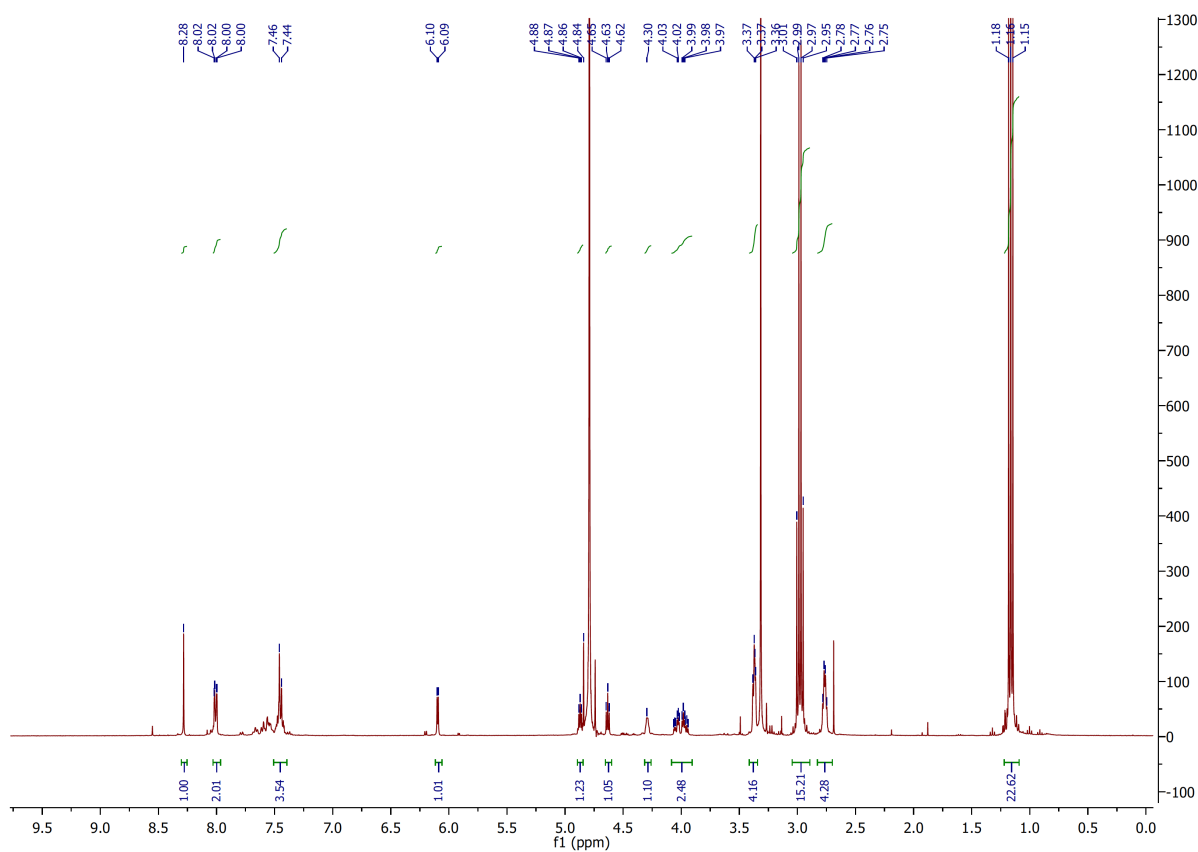

### <sup>1</sup>H NMR: 13a

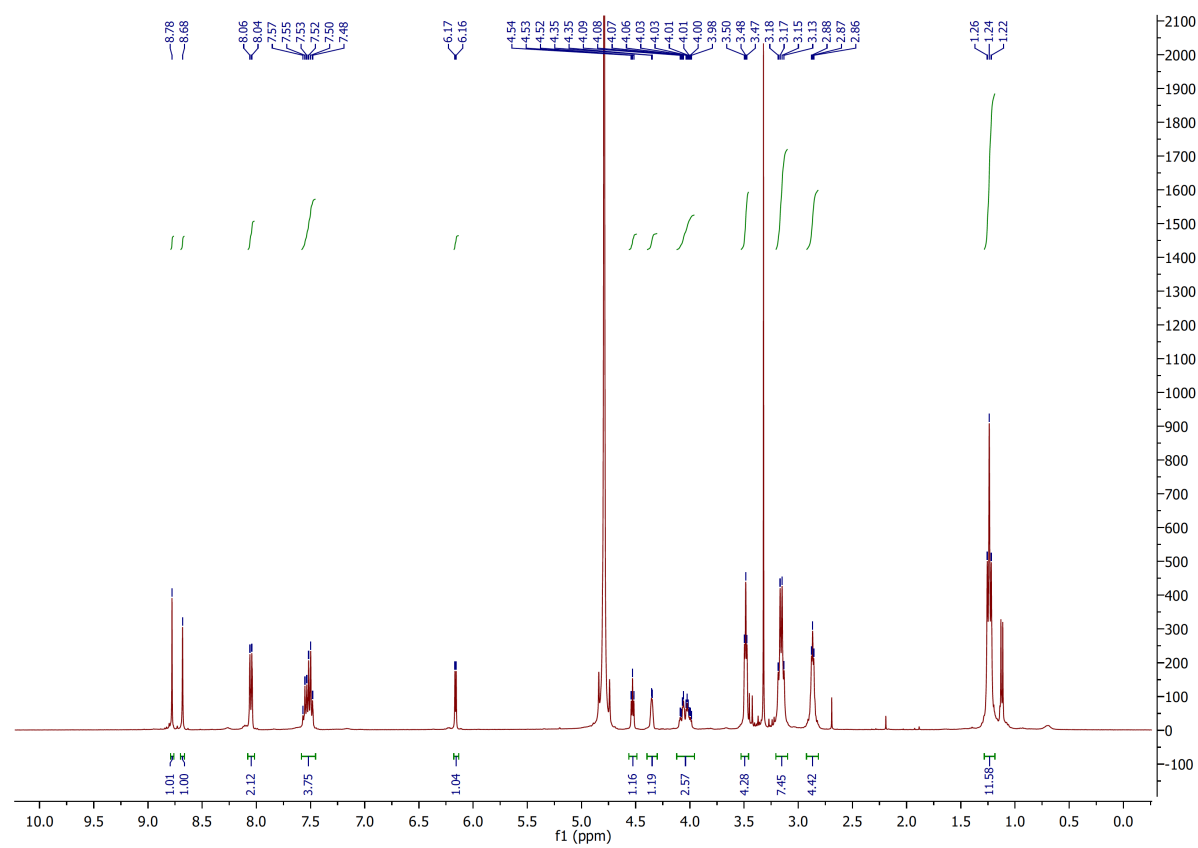



## <sup>1</sup>H NMR: 13b

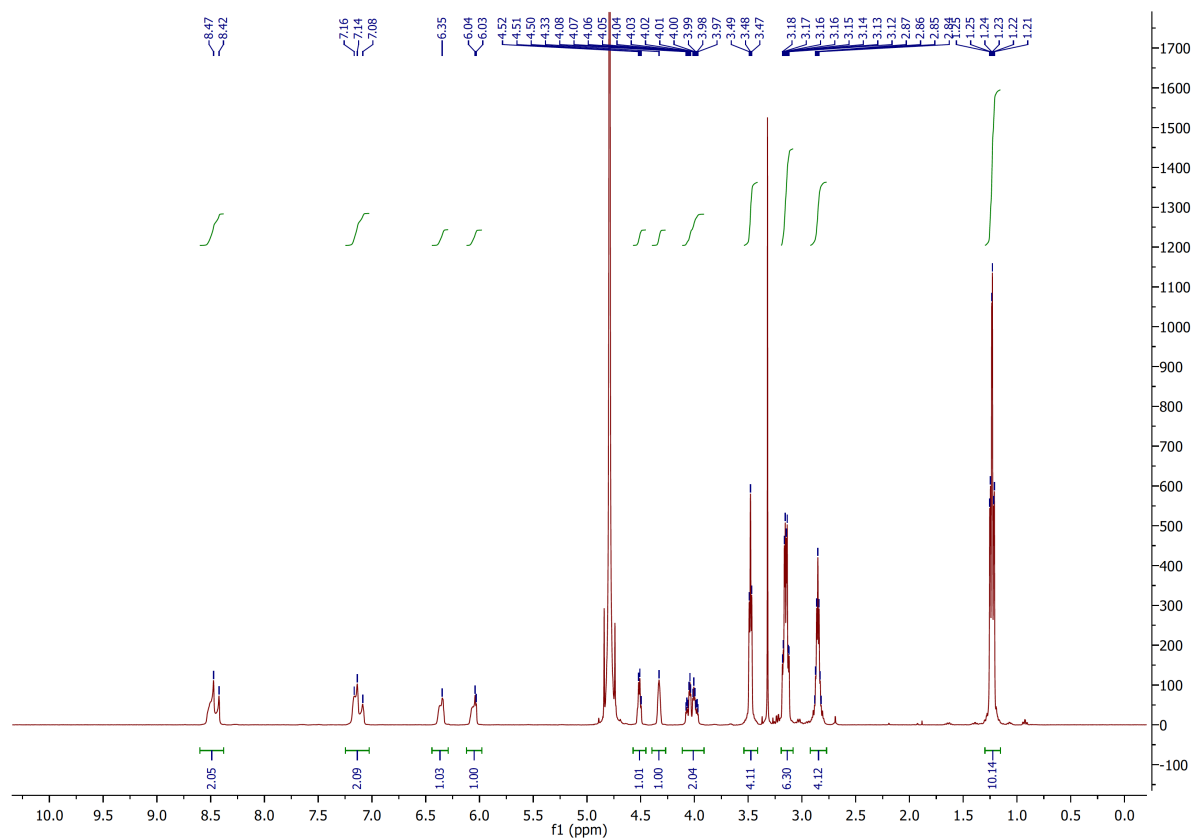

## (2) Concentration-response curves from IC<sub>50</sub> experiments

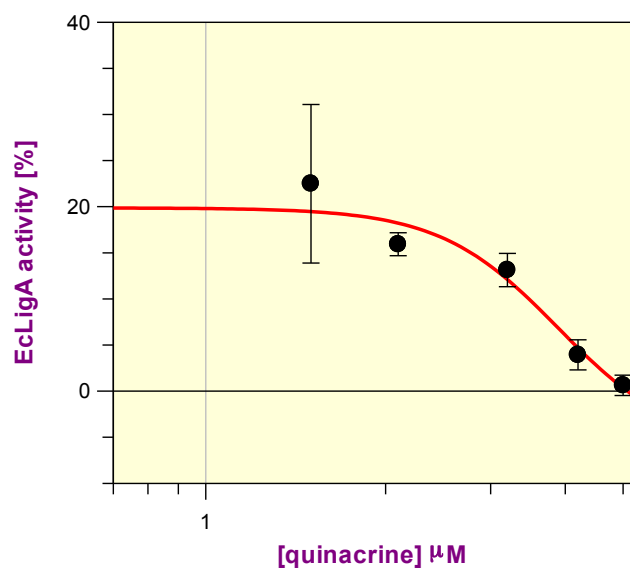

IC<sub>50</sub> estimation for quinacrine against EcLigA. Conditions: DNA substrate (0.5 μM), β-NAD<sup>+</sup> (26 μM), EcLigA (0.07 μM), quinacrine·2HCl (0 - 5 μM) in 1 x buffer (30 mM Tris/HCl pH 8, 4 mM MgCl<sub>2</sub>, 1 mM DTT, 50 μg/mL BSA) incubated at 30 °C under shaking and sampled at 5 min; all concentrations are final concentrations. Bars indicate mean values ± S.D. of triplicate experiments.

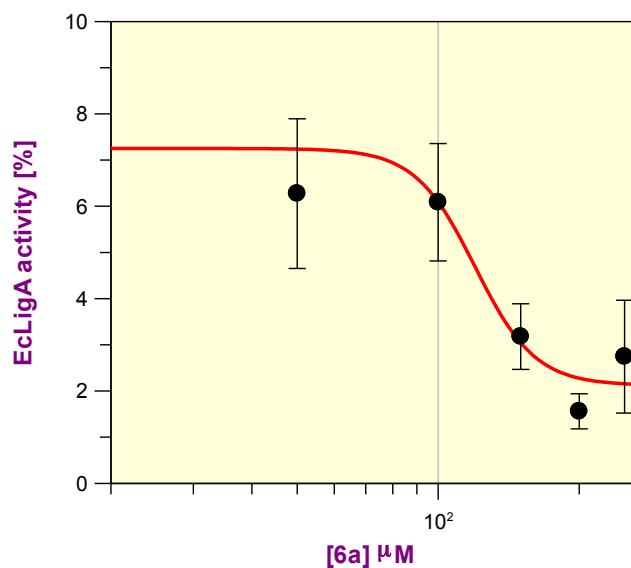

IC<sub>50</sub> estimation for 2-iodo AMP **6a** against EcLigA. Conditions: DNA substrate (0.5  $\mu\text{M}$ ),  $\beta$ -NAD<sup>+</sup> (26  $\mu\text{M}$ ), EcLigA (0.07  $\mu\text{M}$ ), **6a** (0 - 250  $\mu\text{M}$ ) in 1 x buffer (30 mM Tris/HCl pH 8, 4 mM MgCl<sub>2</sub>, 1 mM DTT, 50  $\mu\text{g}/\text{mL}$  BSA) incubated at 30 °C under shaking and sampled at 5 min; all concentrations are final concentrations. Bars indicate mean values  $\pm$  S.D. of triplicate experiments.

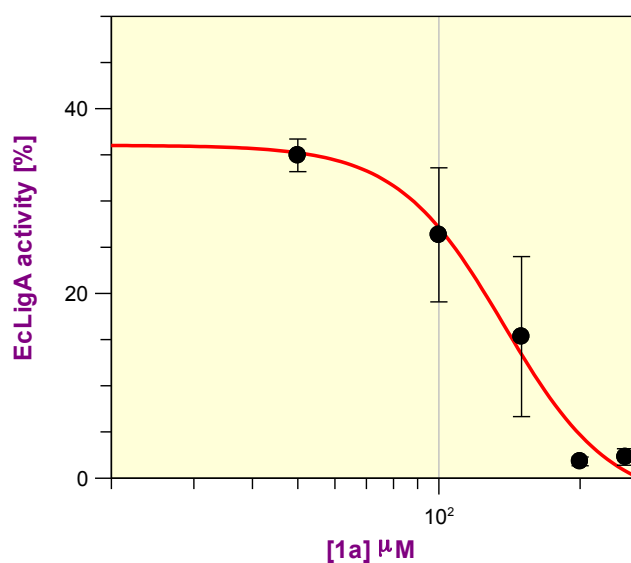

IC<sub>50</sub> estimation for 2-iodo NAD<sup>+</sup> **1a** against EcLigA. Conditions: DNA substrate (0.5  $\mu\text{M}$ ),  $\beta$ -NAD<sup>+</sup> (26  $\mu\text{M}$ ), EcLigA (0.07  $\mu\text{M}$ ), **1a** (0 - 250  $\mu\text{M}$ ) in 1 x buffer (30 mM Tris/HCl pH 8, 4 mM MgCl<sub>2</sub>, 1 mM DTT, 50  $\mu\text{g}/\text{mL}$  BSA) incubated at 30 °C under shaking and sampled at 5 min; all concentrations are final concentrations. Bars indicate mean values  $\pm$  S.D. of triplicate experiments.

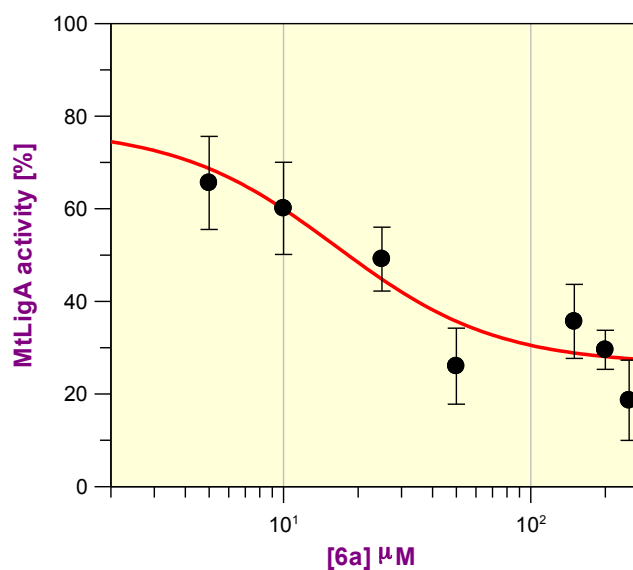

IC<sub>50</sub> estimation for 2-iodo AMP **6a** against MtLigA. Conditions: DNA substrate (0.5 µM), β-NAD<sup>+</sup> (26 µM), MtLigA (0.17 µM), **6a** (0 - 250 µM) in 1 x buffer (30 mM Tris/HCl pH 8, 4 mM MgCl<sub>2</sub>, 1 mM DTT, 50 µg/mL BSA) incubated at 30 °C under shaking and sampled at 5 min; all concentrations are final concentrations. Bars indicate mean values ± S.D. of triplicate experiments.

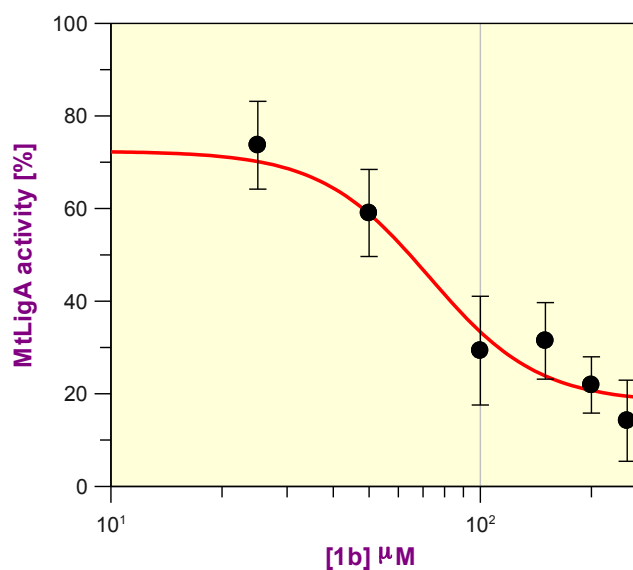

IC<sub>50</sub> estimation for 2-phenyl NAD<sup>+</sup> **1b** against MtLigA. Conditions: DNA substrate (0.5 µM), β-NAD<sup>+</sup> (26 µM), MtLigA (0.17 µM), **1b** (0 - 250 µM) in 1 x buffer (30 mM Tris/HCl pH 8, 4 mM MgCl<sub>2</sub>, 1 mM DTT, 50 µg/mL BSA) incubated at 30 °C under shaking and sampled at 5 min; all concentrations are final concentrations. Bars indicate mean values ± S.D. of triplicate experiments.
